# Supplementary material
Source: Springer Nature journal article supplement (https://www.springermedizin.de/resource/supplementary/12885_2013_4431_MOESM5_ESM.pdf/9466432)

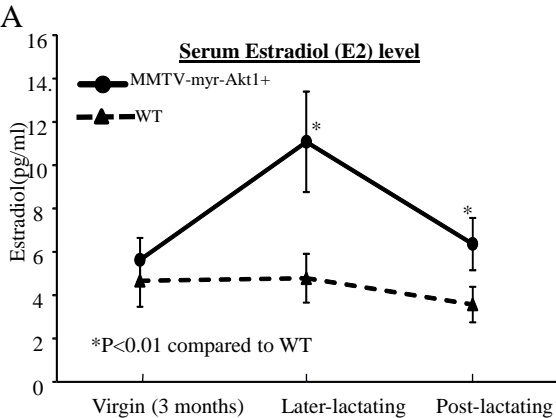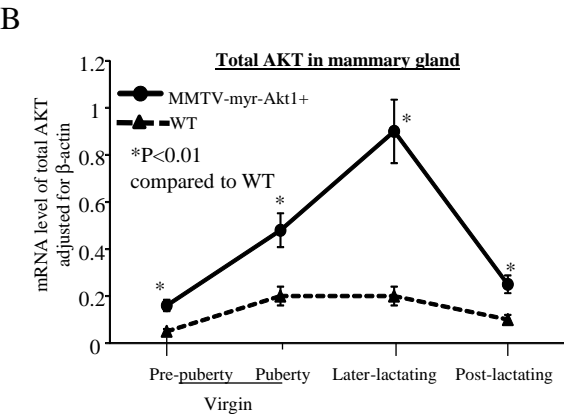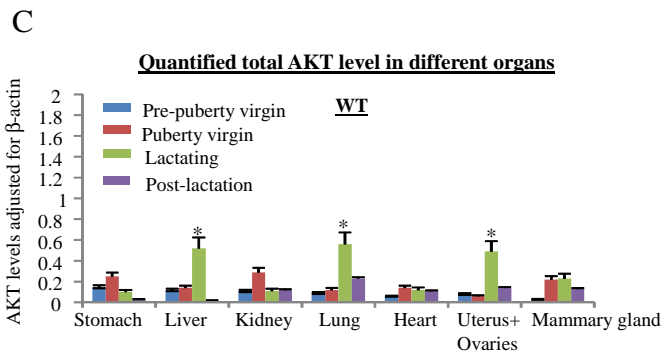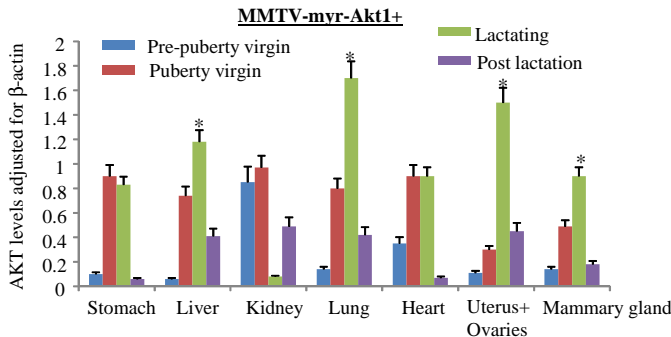

\*p<0.05 compared to virgin

Supplement: MOESM5 [file 9466432]
